# Supplementary material
Source: publisher site journal article supplement (https://www.spandidos-publications.com/5681/downloadSupplementary)
Supplement: Supplementary file 1 [file downloadSupplementary]

## Sheet: Sheet1
Table SI. The genes involved in 26 signaling pathways in CRC tissues vs. normal tissues.
pathID	pathDescription	geneRatio	bgRatio	pvalue	padj	qvalue	enrichScore	overlapGeneList	overlapGeneCount	style
hsa04151	PI3K-Akt signaling pathway	26/265	354/8081	9.16101e-05	0.00579588	0.00530118	2.2397	COL1A2/COL1A1/CCND1/COL4A1/ITGB8/FGF18/EFNA3/BDNF/COL9A3/THBS2/DDIT4/SPP1/VEGFA/CCNE1/EPO/EIF4EBP1/ANGPT2/IGF2/IBSP/COL6A6/CDK4/EREG/BRCA1/CDK2/PPP2R2C/CSF3	26	up
hsa04115	p53 signaling pathway	10/265	73/8081	0.00012176	0.00579588	0.00530118	4.17731	CCND1/RRM2/CHEK1/SERPINE1/CCNE1/CDK1/CDK4/CDK2/PMAIP1/TP73	10	up
hsa04512	ECM-receptor interaction	11/265	88/8081	0.000130586	0.00579588	0.00530118	3.81179	COL1A2/COL1A1/DMP1/COL4A1/ITGB8/COL9A3/THBS2/SPP1/IBSP/COL6A6/CD44	11	up
hsa04218	Cellular senescence	15/265	156/8081	0.00017497	0.00579588	0.00530118	2.93215	E2F5/CCND1/CDC25A/CHEK1/CACNA1D/MYBL2/SERPINE1/IL1A/CCNE1/EIF4EBP1/CDK1/CDK4/CCNA2/CDK2/GATA4	15	up
hsa04390	Hippo signaling pathway	15/265	157/8081	0.000187861	0.00579588	0.00530118	2.91347	FZD3/NKD1/CCND1/FZD10/SERPINE1/AXIN2/WNT3A/WNT7A/TEAD4/BMP7/LEF1/PPP2R2C/SOX2/TP73/WNT7B	15	up
hsa04110	Cell cycle	13/265	124/8081	0.000200884	0.00579588	0.00530118	3.19699	ESPL1/E2F5/CCND1/CDC25A/CHEK1/CDC7/DBF4/CCNE1/CDK1/CDK4/CCNA2/TTK/CDK2	13	up
hsa04310	Wnt signaling pathway	14/265	160/8081	0.000749634	0.0153646	0.0140532	2.66825	FZD3/NKD1/CCND1/FZD10/PLCB4/RNF43/FOSL1/AXIN2/WNT3A/WNT7A/ZNRF3/PRKCG/LEF1/WNT7B	14	up
hsa05202	Transcriptional misregulation in cancer	15/265	192/8081	0.00157012	0.0246601	0.0225553	2.38237	MYCN/HOXA9/HMGA2/SIX4/SIX1/PAX3/RUNX1/PLAU/EYA1/CEBPB/TLX3/PAX7/ETV5/CCNA2/ETV4	15	up
hsa04060	Cytokine-cytokine receptor interaction	19/265	295/8081	0.00373819	0.0525314	0.0480477	1.96404	TNFSF9/IL13/INHBB/LIF/TNFRSF11B/IL1A/RELT/TNFSF4/EPO/EDAR/TNFRSF19/IL36RN/BMP7/IL1RAP/IL11/CSF3/TNFSF11/IL17A/IL20RA	19	up
hsa04510	Focal adhesion	13/265	201/8081	0.0148259	0.146611	0.134097	1.97227	COL1A2/COL1A1/CCND1/COL4A1/ITGB8/COL9A3/THBS2/RASGRF1/SPP1/VEGFA/IBSP/PRKCG/COL6A6	13	up
hsa04010	MAPK signaling pathway	17/265	294/8081	0.016402	0.156404	0.143055	1.76328	CACNA1E/FGF18/EFNA3/BDNF/CACNA1D/RASGRF1/DUSP10/IL1A/VEGFA/ANGPT2/CACNG4/IGF2/PRKCG/IRAK1/EREG/IL1RAP/DUSP9	17	up
hsa04020	Calcium signaling pathway	46/448	240/8081	5.09611e-14	1.4371e-11	1.05677e-11	3.45727	P2RX1/NTRK3/ADRB2/ATP2B4/HTR4/ADRB1/ADRB3/SLC8A2/NGF/MYLK/FGFR1/FGF9/FGF2/NOS1/ADORA2A/FGF7/CHRM2/P2RX4/PDGFRA/SLC8A3/PDE1A/CACNA1C/ITPR1/GRIN2A/RYR3/PRKCB/EDNRB/CACNA1B/ADCY2/GDNF/ERBB4/CAMK4/ATP2B2/TRDN/ATP2B1/STIM1/ADCY9/SLC8A1/PRKACB/HTR7/FGFR2/CACNA1A/CAMK2A/TACR3/GNAL/PDGFD	46	down
hsa04024	cAMP signaling pathway	38/448	216/8081	1.32379e-10	1.86655e-08	1.37256e-08	3.17334	ADRB2/ATP2B4/HTR4/ADRB1/GRIN3A/ADCY5/ADORA2A/ACOX1/CHRM2/HCN4/TIAM1/ATP1A2/RAP1A/CACNA1C/PDE4D/GRIN2A/GRIA4/CNGA3/PLD1/ADCY2/GRIA2/VIP/CAMK4/ATP2B2/ATP2B1/ADCY9/SLC9A1/ADCYAP1/GRIA1/PRKACB/GLI3/SST/CAMK2A/ATP1B2/SSTR1/GRIA3/PDE3A/MAPK10	38	down
hsa04151	PI3K-Akt signaling pathway	46/448	354/8081	4.01817e-08	1.66154e-06	1.22181e-06	2.34391	PRKAA2/COL4A6/CDKN1A/ITGB3/GHR/IGF1/NGF/SGK1/FGFR1/FGF9/FGF2/BCL2/RELN/FLT3/SOS2/FGF7/CHRM2/BCL2L11/PPP2R3A/PHLPP2/PDGFRA/IL6R/PIK3CG/MAGI2/GNG11/PCK1/IL2/KITLG/CSF1R/EFNA5/GNG12/ERBB4/KIT/TNXB/RXRA/LPAR1/FGFR2/CSF1/NGFR/COL4A5/GNG2/CHAD/TEK/FLT3LG/GNG7/PDGFD	46	down
hsa04015	Rap1 signaling pathway	32/448	210/8081	1.40962e-07	3.97513e-06	2.9231e-06	2.74864	ITGB3/IGF1/NGF/FGFR1/FGF9/ADCY5/FGF2/ADORA2A/SIPA1L2/FGF7/TIAM1/PDGFRA/RAP1A/MAGI2/CNR1/GRIN2A/PRKCB/KITLG/GNAO1/CSF1R/EFNA5/ADCY2/KIT/MAGI3/ADCY9/LPAR1/FGFR2/MAP2K6/CSF1/NGFR/TEK/PDGFD	32	down
hsa04010	MAPK signaling pathway	39/448	294/8081	2.68058e-07	6.87204e-06	5.05335e-06	2.39279	MEF2C/DUSP1/IGF1/NGF/PTPRR/FGFR1/RPS6KA6/FGF9/FGF2/FLT3/SOS2/FGF7/RPS6KA5/PDGFRA/RAP1A/CACNA1C/CACNB2/PRKCB/MAPT/KITLG/CSF1R/FLNB/CACNA1B/EFNA5/GNG12/ERBB4/KIT/ARRB1/PRKACB/FGFR2/MAP2K6/CACNA1A/CSF1/NGFR/CACNA2D3/MAPK10/TEK/FLT3LG/PDGFD	39	down
hsa04014	Ras signaling pathway	33/448	232/8081	4.65501e-07	9.37651e-06	6.89501e-06	2.56574	IGF1/NGF/FGFR1/FGF9/FGF2/FLT3/SOS2/FGF7/GAB1/RGL1/TIAM1/PDGFRA/RAP1A/GNG11/GRIN2A/PRKCB/KITLG/CSF1R/PLD1/EFNA5/GNG12/KIT/PRKACB/HTR7/FGFR2/CSF1/NGFR/MAPK10/GNG2/TEK/FLT3LG/GNG7/PDGFD	33	down
hsa01521	EGFR tyrosine kinase inhibitor resistance	14/448	79/8081	9.48872e-05	0.000950078	0.000698639	3.1966	IGF1/FGF2/BCL2/SOS2/GAB1/BCL2L11/PDGFRA/IL6R/PRKCB/AXL/NRG1/NRG2/FGFR2/PDGFD	14	down
hsa04514	Cell adhesion molecules	19/448	149/8081	0.000549445	0.00407746	0.00299835	2.30014	CNTNAP1/NCAM2/NRXN1/NFASC/NRXN2/CNTN2/L1CAM/NTNG1/NCAM1/NEGR1/NEO1/NLGN4X/NLGN4Y/IGSF11/CLDN11/NLGN1/PTPRF/NLGN3/MPZ	19	down
hsa04310	Wnt signaling pathway	17/448	160/8081	0.00728825	0.038779	0.0285161	1.91653	RSPO2/RSPO3/TCF7L1/PPARD/SOX17/CTNND2/PRKCB/LGR4/SFRP2/PRKACB/SFRP1/ROR1/CAMK2A/PRICKLE2/DAAM2/MAPK10/WNT2B	17	down
hsa04510	Focal adhesion	20/448	201/8081	0.00782528	0.0408653	0.0300503	1.79482	COL4A6/ITGB3/IGF1/PPP1R12B/MYLK/BCL2/RELN/SOS2/PDGFRA/VCL/RAP1A/PRKCB/FLNB/CAV1/TNXB/PIP5K1B/COL4A5/MAPK10/CHAD/PDGFD	20	down
hsa05202	Transcriptional misregulation in cancer	19/448	192/8081	0.00994428	0.0483498	0.035554	1.78501	MEF2C/CDKN1A/PBX1/RUNX1T1/TMPRSS2/IGF1/FLT3/NR4A3/HPGD/CSF1R/ZEB1/RXRA/TSPAN7/FLI1/GRIA3/NGFR/MAF/LMO2/RXRG	19	down
hsa04630	JAK-STAT signaling pathway	16/448	162/8081	0.0174625	0.072562	0.0533584	1.78153	CDKN1A/GHR/IL10/BCL2/IL10RA/SOS2/IL6ST/PDGFRA/IL6R/LIFR/IL2/CNTFR/LEPR/LEP/SOCS2/FHL1	16	down
hsa04062	Chemokine signaling pathway	18/448	192/8081	0.0198243	0.0798634	0.0587275	1.69106	CCR7/ADCY5/SOS2/TIAM1/RAP1A/PIK3CG/GNG11/PRKCB/CXCR5/ADCY2/GNG12/ADCY9/CXCL12/ARRB1/PRKACB/CCL8/GNG2/GNG7	18	down
hsa04060	Cytokine-cytokine receptor interaction	25/448	295/8081	0.0221052	0.0867065	0.0637595	1.52864	CCR7/ACVR1C/GDF6/GHR/IL10/NGF/IL10RA/IL6ST/BMP2/IL6R/BMP3/LIFR/IL2/CNTFR/CXCR5/CSF1R/LEPR/LEP/CXCL12/EBI3/CCL8/CSF1/NGFR/MSTN/TNFRSF13C	25	down
